# Supplementary material for: Sedentary behaviour in relation to ovarian cancer risk: a systematic review and meta-analysis
Source: PubMed Central journal article supplement (PMC8417015; doi:10.1007/s10654-020-00712-6), 2021-01-25
Supplement: 10654_2020_712_MOESM2_ESM.pdf [file 10654_2020_712_MOESM2_ESM.pdf]

**European Journal of Epidemiology**

**Sedentary behaviour in relation to ovarian cancer risk: a systematic review and meta-analysis**

Veronika S. Biller<sup>1</sup>, Michael F. Leitzmann<sup>1</sup>, Anja M. Sedlmeier<sup>1</sup>, Felix F. Berger<sup>1</sup>, Olaf Ortmann<sup>2</sup>, Carmen Jochem<sup>1</sup>

1) Department of Epidemiology and Preventive Medicine, University of Regensburg, Germany

2) Department of Gynaecology and Obstetrics, University of Regensburg, Germany

Correspondence to:

Ms. Veronika S. Biller

Department of Epidemiology and Preventive Medicine

University of Regensburg

Franz-Josef-Strauss-Allee 11

Regensburg, 93053

Germany, DE

Phone: +49 941 944-5201

E-Mail: [veronika.biller@stud.uni-regensburg.de](mailto:veronika.biller@stud.uni-regensburg.de)

ORCID-ID: 0000-0003-4506-4895

## Online Resource 2 Full search strategy for PubMed

Database last searched on 25 February 2020

| Set                                         | Search Terms                                                                                                                                                                                                                                                                                                                                                                                                                                                                                                                                                                                                                                                                                                                                                                                                                                                                                                                                                                                                                                                                                                                                                                                                                                                                                                                                                                                  |
|---------------------------------------------|-----------------------------------------------------------------------------------------------------------------------------------------------------------------------------------------------------------------------------------------------------------------------------------------------------------------------------------------------------------------------------------------------------------------------------------------------------------------------------------------------------------------------------------------------------------------------------------------------------------------------------------------------------------------------------------------------------------------------------------------------------------------------------------------------------------------------------------------------------------------------------------------------------------------------------------------------------------------------------------------------------------------------------------------------------------------------------------------------------------------------------------------------------------------------------------------------------------------------------------------------------------------------------------------------------------------------------------------------------------------------------------------------|
| Sedentary behaviour and its synonyms        | (sedentary behavior OR sedentary behaviour OR sedentary lifestyle) OR (prolonged sitting time OR time spent sitting OR time-spent sitting OR sitting time OR lying time[title/abstract]) OR (leisure time OR leisure activities[MeSH] OR leisure time OR leisure time sitting OR leisure-time sitting OR leisure-time spent sitting OR leisure time spent sitting) OR (computer use[title/abstract] OR computer usage[title/abstract] OR computer time[title/abstract] OR internet use[title/abstract] OR internet usage[title/abstract] OR internet time[title/abstract]) OR (television viewing OR television watching OR television time OR tv viewing OR tv watching OR TV time[title/abstract] OR watch television OR view television OR watch tv OR view tv OR screen watching[title/abstract] OR screen use[title/abstract] OR screen time OR screen entertainment OR screen behaviour OR screen behavior OR screen-based entertainment OR screen-based behaviour OR screen-based behavior) OR (computer game time[title/abstract] OR computer gaming time[title/abstract] OR video game time[title/abstract] OR video gaming time[title/abstract] OR computer game[title/abstract] OR computer gaming[title/abstract] OR video game[title/abstract] OR video gaming[title/abstract]) OR (Automobile driving[MeSH] OR transport time) OR (Reading[MeSH] OR reading time) OR Rest[MeSH] |
| Ovarian Cancer                              | AND (Ovarian Neoplasms[Mesh] OR site-specific[title/abstract] OR site specific[title/abstract] OR site-specific cancer incidence[title/abstract] OR site specific cancer incidence[title/abstract])                                                                                                                                                                                                                                                                                                                                                                                                                                                                                                                                                                                                                                                                                                                                                                                                                                                                                                                                                                                                                                                                                                                                                                                           |
| Limit: Exclude irrelevant publication type  | NOT (editorial[ptyp] OR comment[ptyp] OR letter[ptyp] OR guideline[ptyp] OR news[ptyp])                                                                                                                                                                                                                                                                                                                                                                                                                                                                                                                                                                                                                                                                                                                                                                                                                                                                                                                                                                                                                                                                                                                                                                                                                                                                                                       |
| Include Human studies only                  | AND Humans[MeSH]                                                                                                                                                                                                                                                                                                                                                                                                                                                                                                                                                                                                                                                                                                                                                                                                                                                                                                                                                                                                                                                                                                                                                                                                                                                                                                                                                                              |
| Include ovarian cancer incidence as outcome | AND (risk[title/abstract] OR incidence[title/abstract] OR cancer incidence[title/abstract])                                                                                                                                                                                                                                                                                                                                                                                                                                                                                                                                                                                                                                                                                                                                                                                                                                                                                                                                                                                                                                                                                                                                                                                                                                                                                                   |

**Online Resource 3** List of 16 full-text articles assessed for eligibility that were excluded from the analysis with reasons of exclusion

| <b>First author, year</b>      | <b>Study design</b>      | <b>Exclusion criteria</b>                                                                                                                |
|--------------------------------|--------------------------|------------------------------------------------------------------------------------------------------------------------------------------|
| Lee, 2019 [1]                  | Meta-analysis            | Incompatible study design: meta-analysis                                                                                                 |
| Minlikeeva et al., 2019 [2]    | Meta-analysis            | Incompatible exposure: physical inactivity<br>Incompatible outcome: ovarian cancer survival<br>Incompatible study design: meta-analysis  |
| Lynch et al., 2018 [3]         | Meta-analysis            | Incompatible study design: meta-analysis                                                                                                 |
| Rangul et al., 2018 [4]        | Prospective cohort study | No data on ovarian cancer incidence                                                                                                      |
| Abbott et al., 2016 [5]        | Case-control study       | Incompatible exposure: physical activity                                                                                                 |
| Cannioto et al., 2016 [6]      | Meta-analysis            | Incompatible exposure: physical inactivity<br>Incompatible study design: meta-analysis                                                   |
| Cannioto et al., 2016 [7]      | Meta-analysis            | Incompatible exposure: physical inactivity<br>Incompatible outcome: ovarian cancer mortality<br>Incompatible study design: meta-analysis |
| Biswas et al., 2015 [8]        | Meta-analysis            | No data on ovarian cancer incidence<br>Incompatible study design: meta-analysis                                                          |
| Patel et al., 2015 [9]         | Prospective cohort study | Updated by a more recent publication                                                                                                     |
| Park et al., 2014 [10]         | Prospective cohort study | Incompatible exposure: physical inactivity<br>No data on ovarian cancer incidence                                                        |
| Schmid, Leitzmann, 2014 [11]   | Meta-analysis            | Incompatible study design: meta-analysis                                                                                                 |
| Shen et al., 2014 [12]         | Meta-analysis            | Incompatible study design: meta-analysis                                                                                                 |
| Friedenreich et al., 2010 [13] | Systematic review        | Incompatible study design: systematic review                                                                                             |
| Lynch et al., 2010 [14]        | Systematic review        | Incompatible study design: systematic review                                                                                             |
| Permeth-Wey et al., 2009 [15]  | Systematic review        | Incompatible study design: systematic review                                                                                             |
| Patel et al., 2006 [16]        | Prospective cohort study | Updated by a more recent publication                                                                                                     |

**Online Resource 4** Funnel plot for overall sedentary behaviour and risk of ovarian cancer; all analysed studies included, trim-and-fill method applied

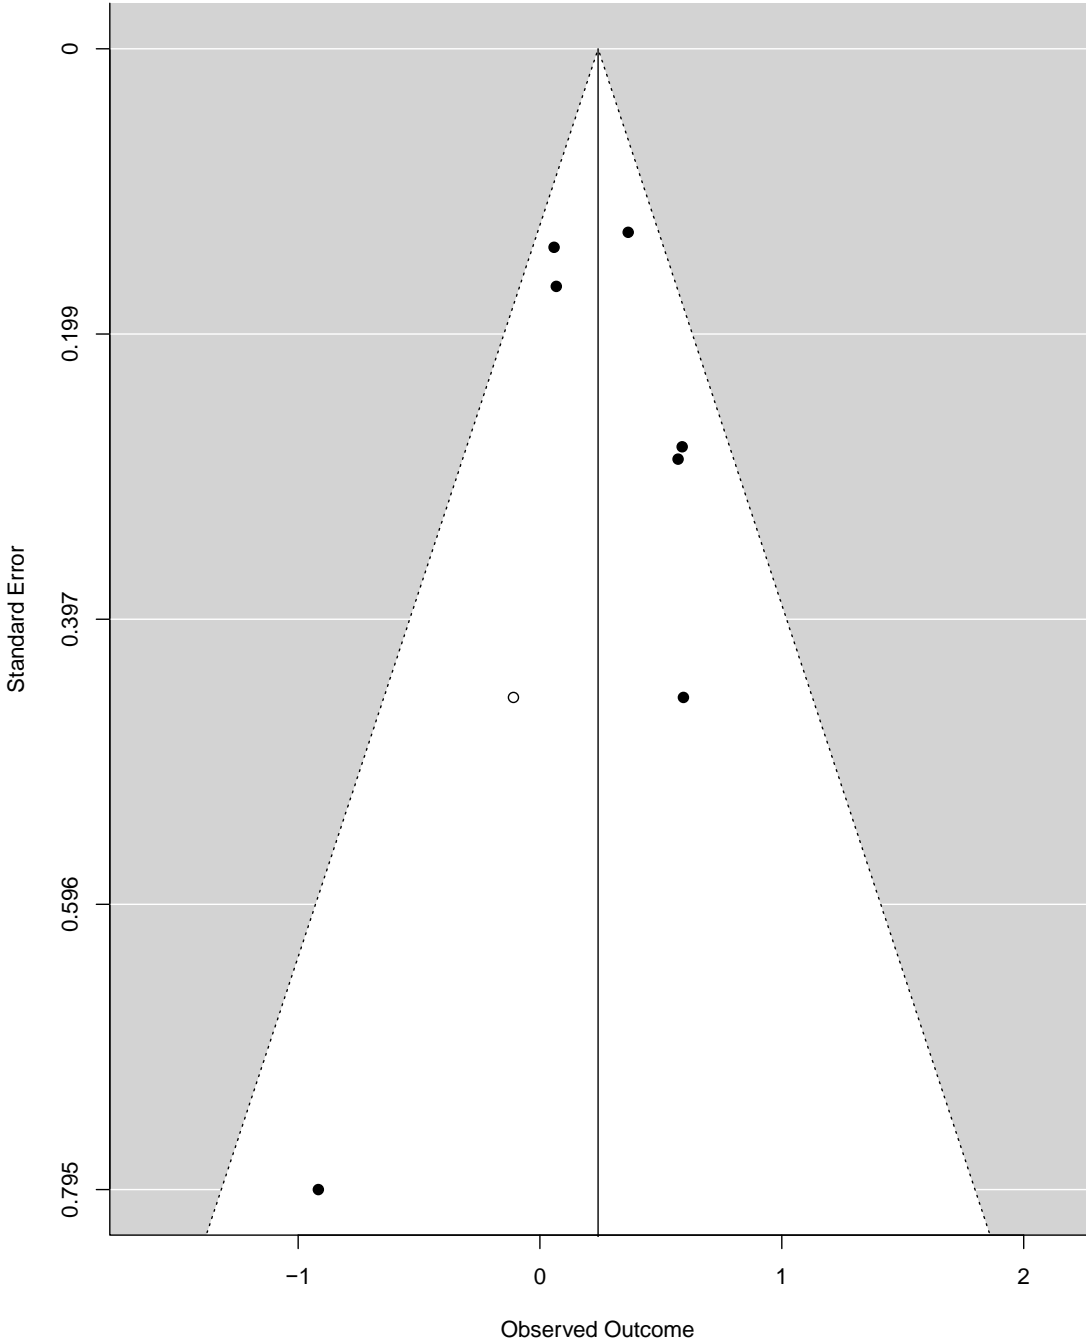

**Online Resource 5** Impact of varying degrees of unmeasured confounding bias on the proportion of studies with true risk ratio > 1.1. RR, risk ratio

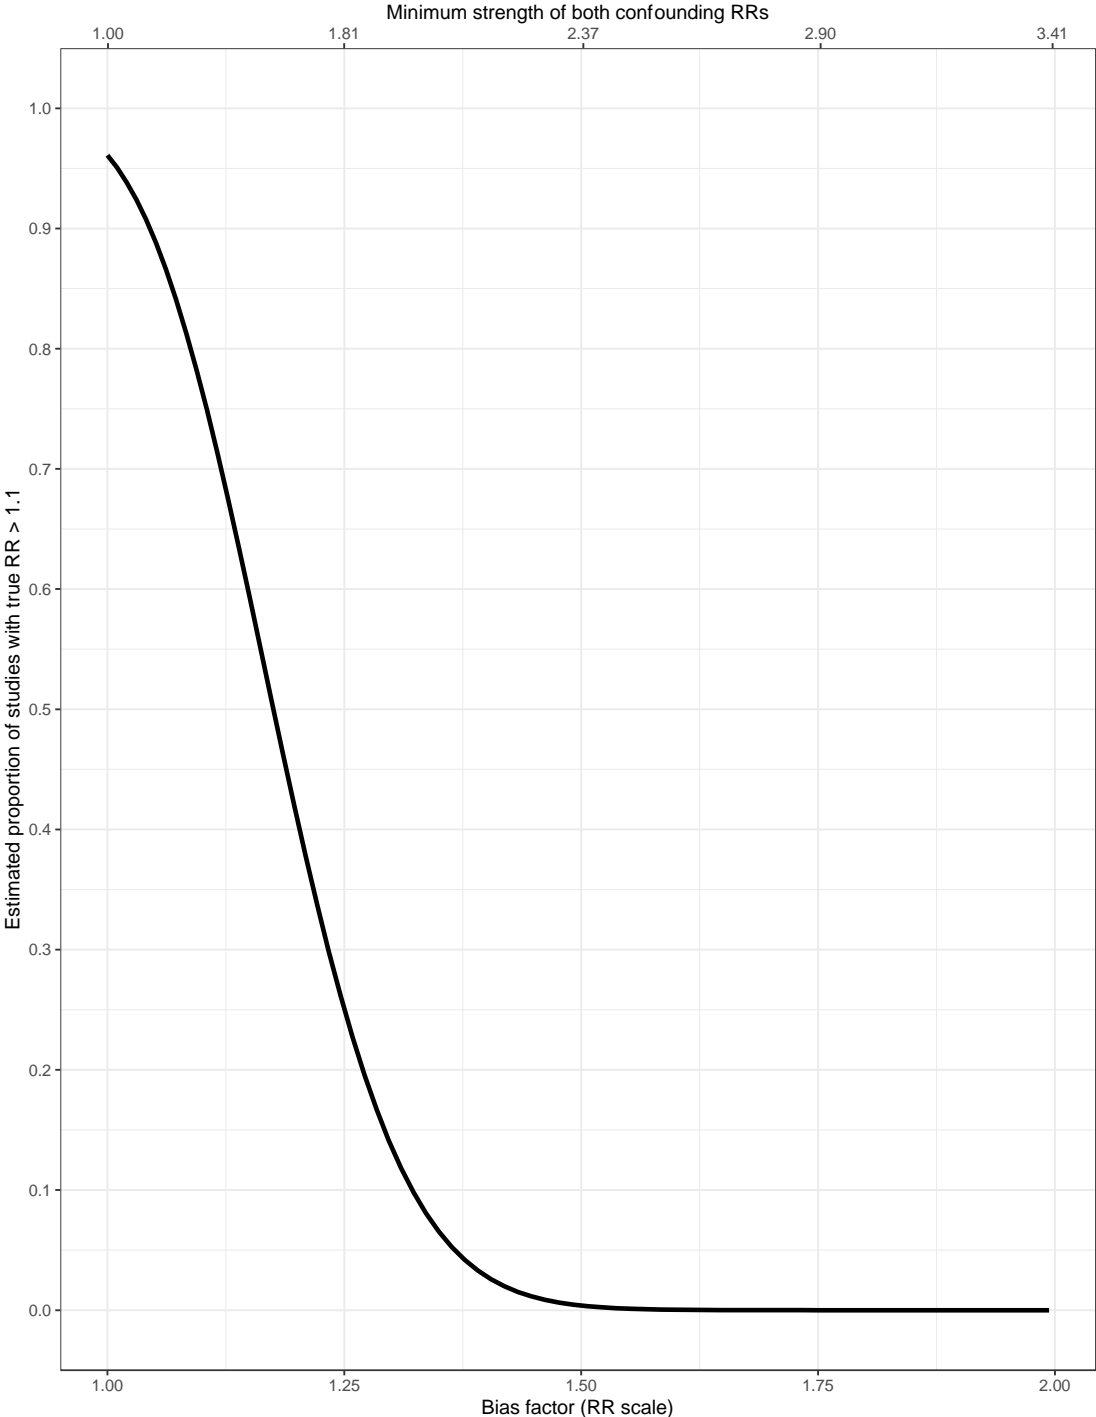

## Online Resource References

1. Lee J. Physical activity, sitting time, and the risk of ovarian cancer: A brief research report employing a meta-analysis of existing. *Health Care for Women International*. 2019;40(4):433-58. doi:10.1080/07399332.2018.1505892.
2. Minlikeeva AN, Cannioto R, Jensen A, Kjaer SK, Jordan SJ, Diergaard B et al. Joint exposure to smoking, excessive weight, and physical inactivity and survival of ovarian cancer patients, evidence from the Ovarian Cancer Association Consortium. *Cancer causes & control : CCC*. 2019;30(5):537-47. doi:10.1007/s10552-019-01157-3.
3. Lynch BM, Mahmood S, Boyle T. Sedentary Behaviour and Cancer. In: Leitzmann MF, Jochem C, Schmid D, editors. *Sedentary Behaviour Epidemiology*. Springer Series on Epidemiology and Public Health. , 2018. p. 245 - 98.
4. Rangul V, Sund ER, Mork PJ, Røe OD, Bauman A. The associations of sitting time and physical activity on total and site-specific cancer incidence: Results from the HUNT study, Norway. *PLOS ONE*. 2018;13(10):e0206015. doi:10.1371/journal.pone.0206015.
5. Abbott SE, Bandera EV, Qin B, Peres LC, Moorman PG, Barnholtz-Sloan J et al. Recreational physical activity and ovarian cancer risk in African American women. *Cancer Med*. 2016;5(6):1319-27. doi:10.1002/cam4.677.
6. Cannioto R, LaMonte MJ, Risch HA, Hong C-C, Sucheston-Campbell LE, Eng KH et al. Chronic Recreational Physical Inactivity and Epithelial Ovarian Cancer Risk: Evidence from the Ovarian Cancer Association Consortium. *Cancer epidemiology, biomarkers & prevention : a publication of the American Association for Cancer Research, cosponsored by the American Society of Preventive Oncology*. 2016;25(7):1114-24. doi:10.1158/1055-9965.EPI-15-1330.
7. Cannioto RA, Lamonte MJ, Kelemen LE, Risch HA, Eng KH, Minlikeeva AN et al. Recreational physical inactivity and mortality in women with invasive epithelial ovarian cancer: evidence from the Ovarian Cancer Association Consortium. *British journal of cancer*. 2016;115(1):95-101. doi:10.1038/bjc.2016.153.
8. Biswas A, Oh PI, Faulkner GE, Bajaj RR, Silver MA, Mitchell MS et al. Sedentary Time and Its Association With Risk for Disease Incidence, Mortality, and Hospitalization in Adults. *Annals of Internal Medicine*. 2015;162(2):123. doi:10.7326/m14-1651.
9. Patel AV, Hildebrand JS, Campbell PT, Teras LR, Craft LL, McCullough ML et al. Leisure-Time Spent Sitting and Site-Specific Cancer Incidence in a Large U.S. Cohort. *Cancer epidemiology, biomarkers & prevention : a publication of the American Association for Cancer Research, cosponsored by the American Society of Preventive Oncology*. 2015;24(9):1350-9. doi:10.1158/1055-9965.EPI-15-0237.
10. Park S, Kim Y, Shin H-R, Lee B, Shin A, Jung K-W et al. Population-attributable causes of cancer in Korea: obesity and physical inactivity. *PloS one*. 2014;9(4):e90871-e. doi:10.1371/journal.pone.0090871.
11. Schmid D, Leitzmann MF. Television viewing and time spent sedentary in relation to cancer risk: a meta-analysis. *J Natl Cancer Inst*. 2014;106(7). doi:10.1093/jnci/dju098.
12. Shen D, Mao W, Liu T, Lin Q, Lu X, Wang Q et al. Sedentary behavior and incident cancer: a meta-analysis of prospective studies. *PLoS One*. 2014;9(8):e105709. doi:10.1371/journal.pone.0105709.
13. Friedenreich CM, Neilson HK, Lynch BM. State of the epidemiological evidence on physical activity and cancer prevention. *Eur J Cancer*. 2010;46(14):2593-604. doi:10.1016/j.ejca.2010.07.028.
14. Lynch BM. Sedentary behavior and cancer: a systematic review of the literature and proposed biological mechanisms. *Cancer epidemiology, biomarkers & prevention : a publication of the American Association for Cancer Research, cosponsored by the American Society of Preventive Oncology*. 2010;19(11):2691-709. doi:10.1158/1055-9965.EPI-10-0815.
15. Permuth-Wey J, Sellers TA. Epidemiology of ovarian cancer. *Methods Mol Biol*. 2009;472:413-37. doi:10.1007/978-1-60327-492-0\_20.
16. Patel AV, Rodriguez C, Pavluck AL, Thun MJ, Calle EE. Recreational physical activity and sedentary behavior in relation to ovarian cancer risk in a large cohort of US women. *Am J Epidemiol*. 2006;163(8):709-16. doi:10.1093/aje/kwj098.
